# Supplementary material
Source: PubMed Central journal article supplement (PMC6052218)
Supplement: supp_RA117.000598_133396_3_supp_128860_p7tx14.pdf [file supp_RA117.000598_133396_3_supp_128860_p7tx14.pdf]

## Supplementary Data

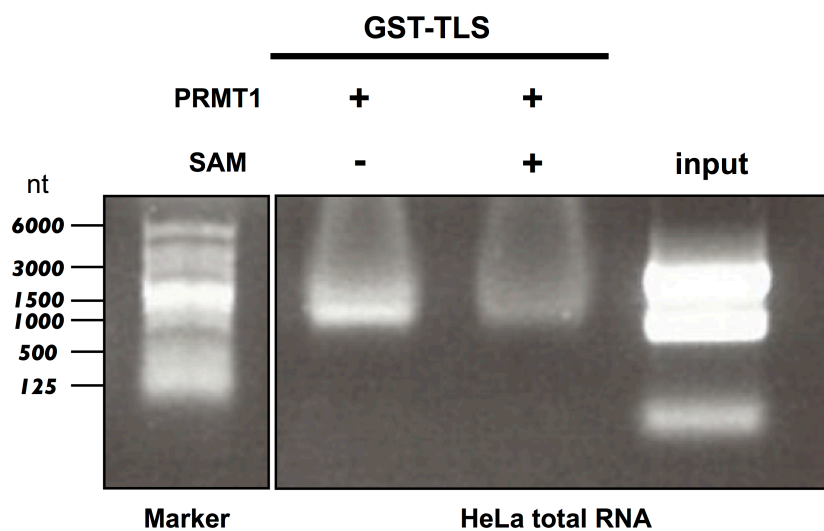

**Figure S1: Arginine methylation reduced the binding of TLS to the HeLa cell total RNA.** Total RNA of HeLa cell (2  $\mu$ g) was pulled down with methylated or unmethylated GST-TLS. The GST-TLS-bound RNA was detected by agarose gel electrophoresis.

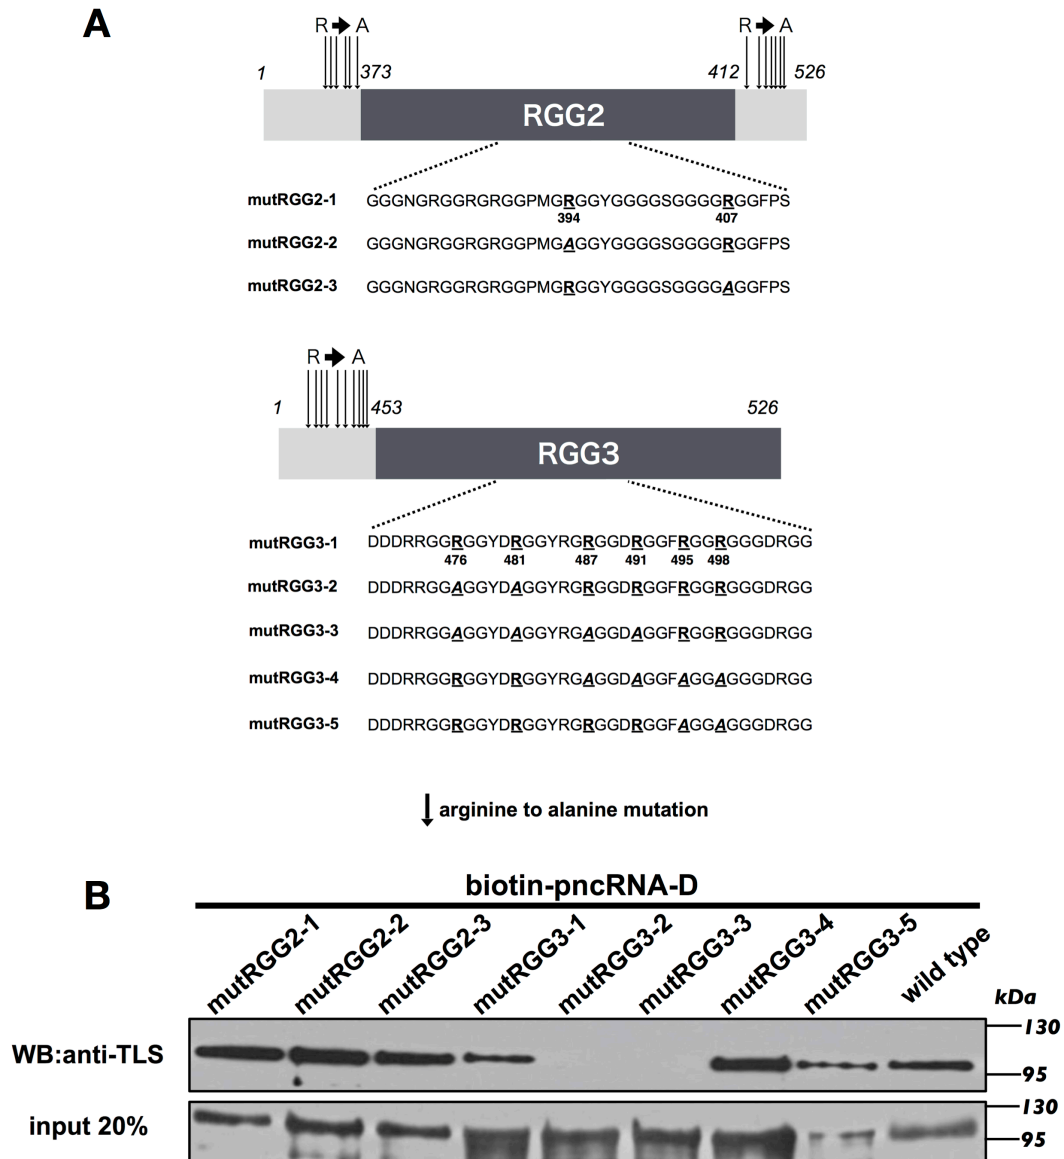

**Figure S2: Identification of arginine residues responsible for pncRNA-D binding.** (A) TLS constructs with the Arg-to-Ala mutations are depicted. All of the arginine residues outside the RGG2 or the RGG3 domain that identified as methylated sites (arrows) were mutated to alanine. The constructs with the substitution of arginine by alanine inside the RGG2 domain (upper; mutRGG2-1, mutRGG2-2, and mutRGG2-3) or the RGG3 domain (below; mutRGG3-1, mutRGG3-2, and mutRGG3-3) were produced. (B) Biotinylated pncRNA-D was incubated with TLS mutants as described in (A). The pncRNA-D-bound TLS was detected by an anti-TLS antibody.
